# Supplementary material
Source: PubMed Central journal article supplement (PMC7006006)
Supplement: Supplemental_Material.pdf [file Supplemental_Material.pdf]

**Supplementary figure 1:** Forest plot reporting the rates of bleedings. CI: confidence interval. RE: random effect.

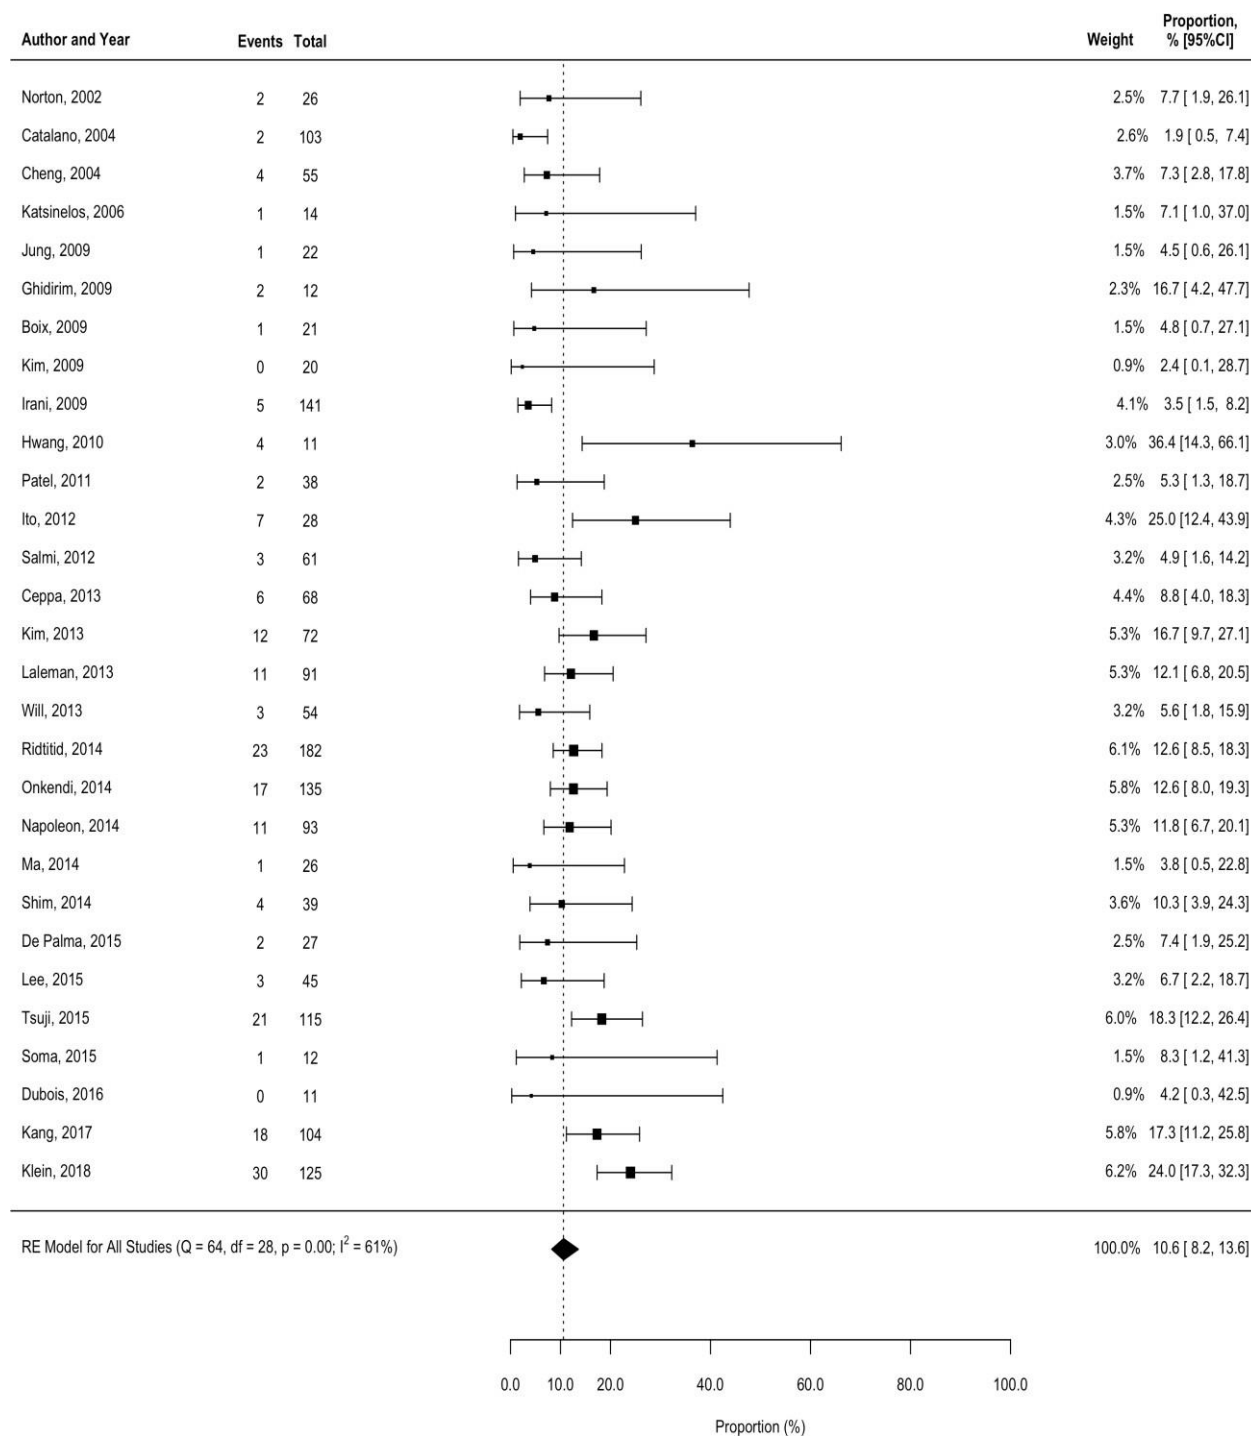

**Supplementary figure 2:** Forest plot reporting the rates of pancreatitis. CI: confidence interval. RE: random effect.

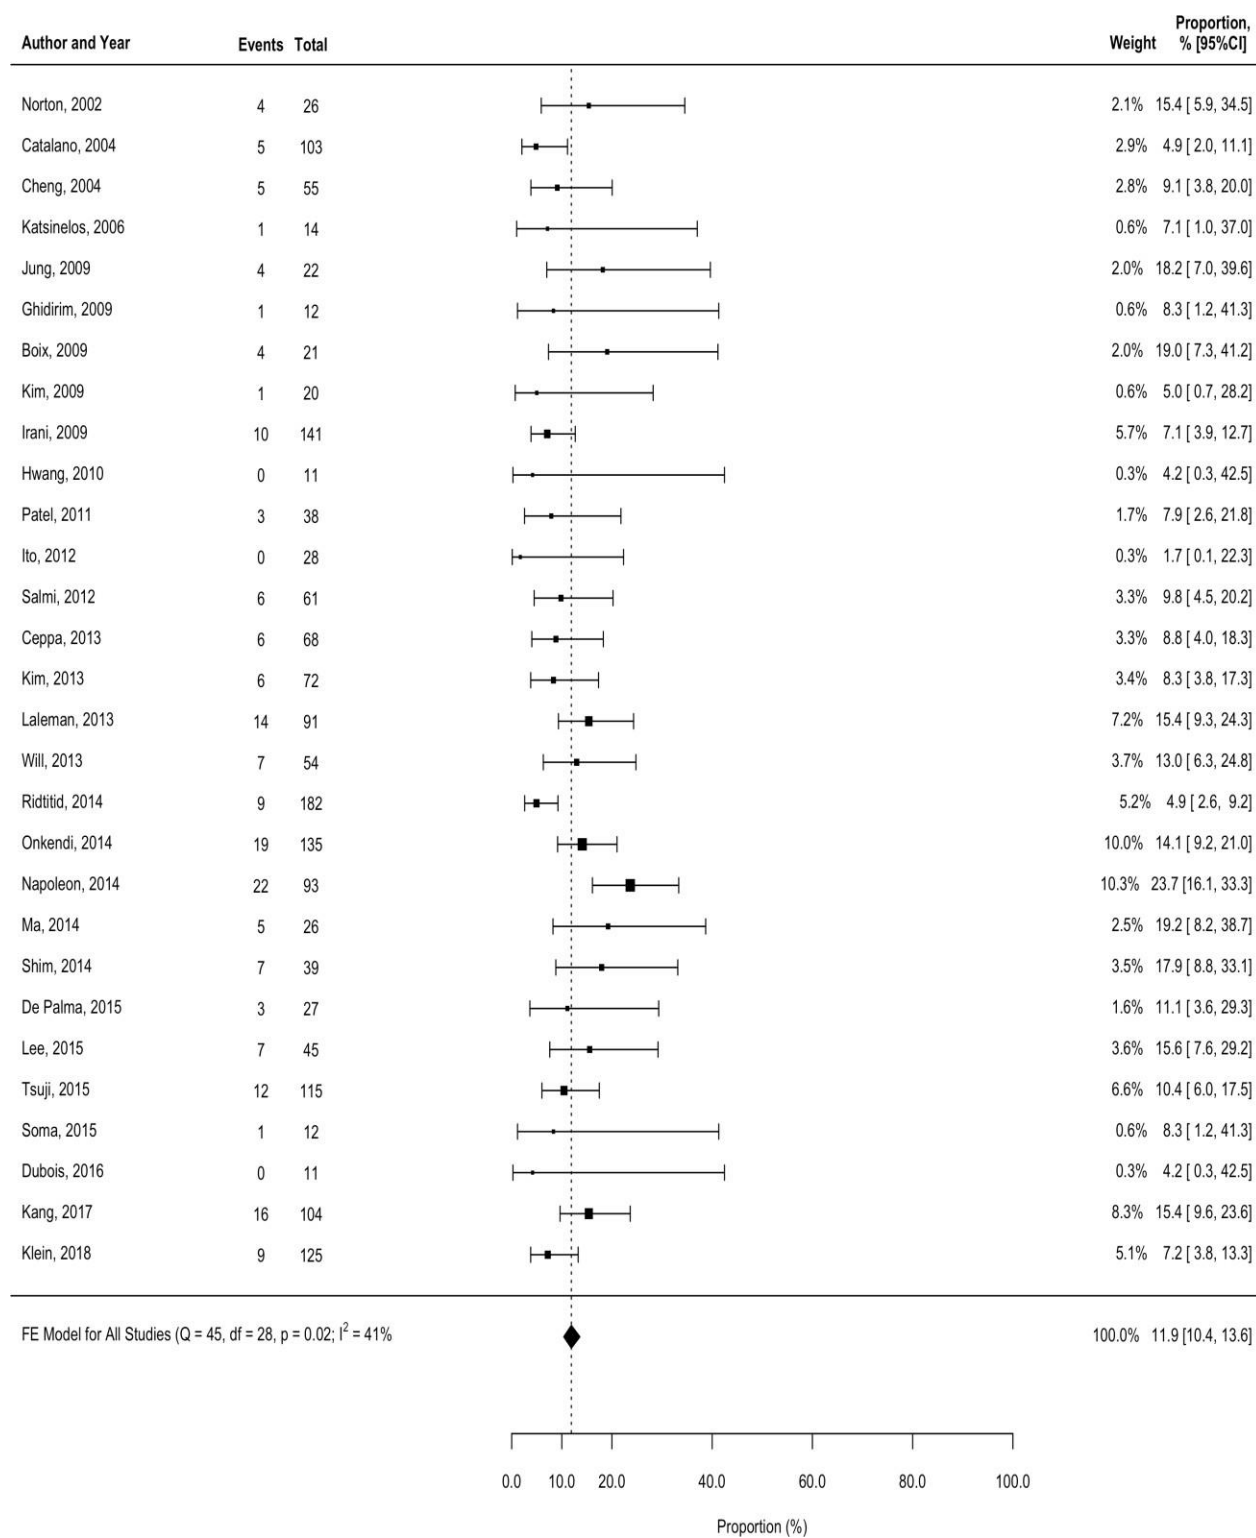

**Supplementary figure 3:** Bubble plot reporting the association between the curative resection occurrence and the proportion of patients with en-bloc resection.

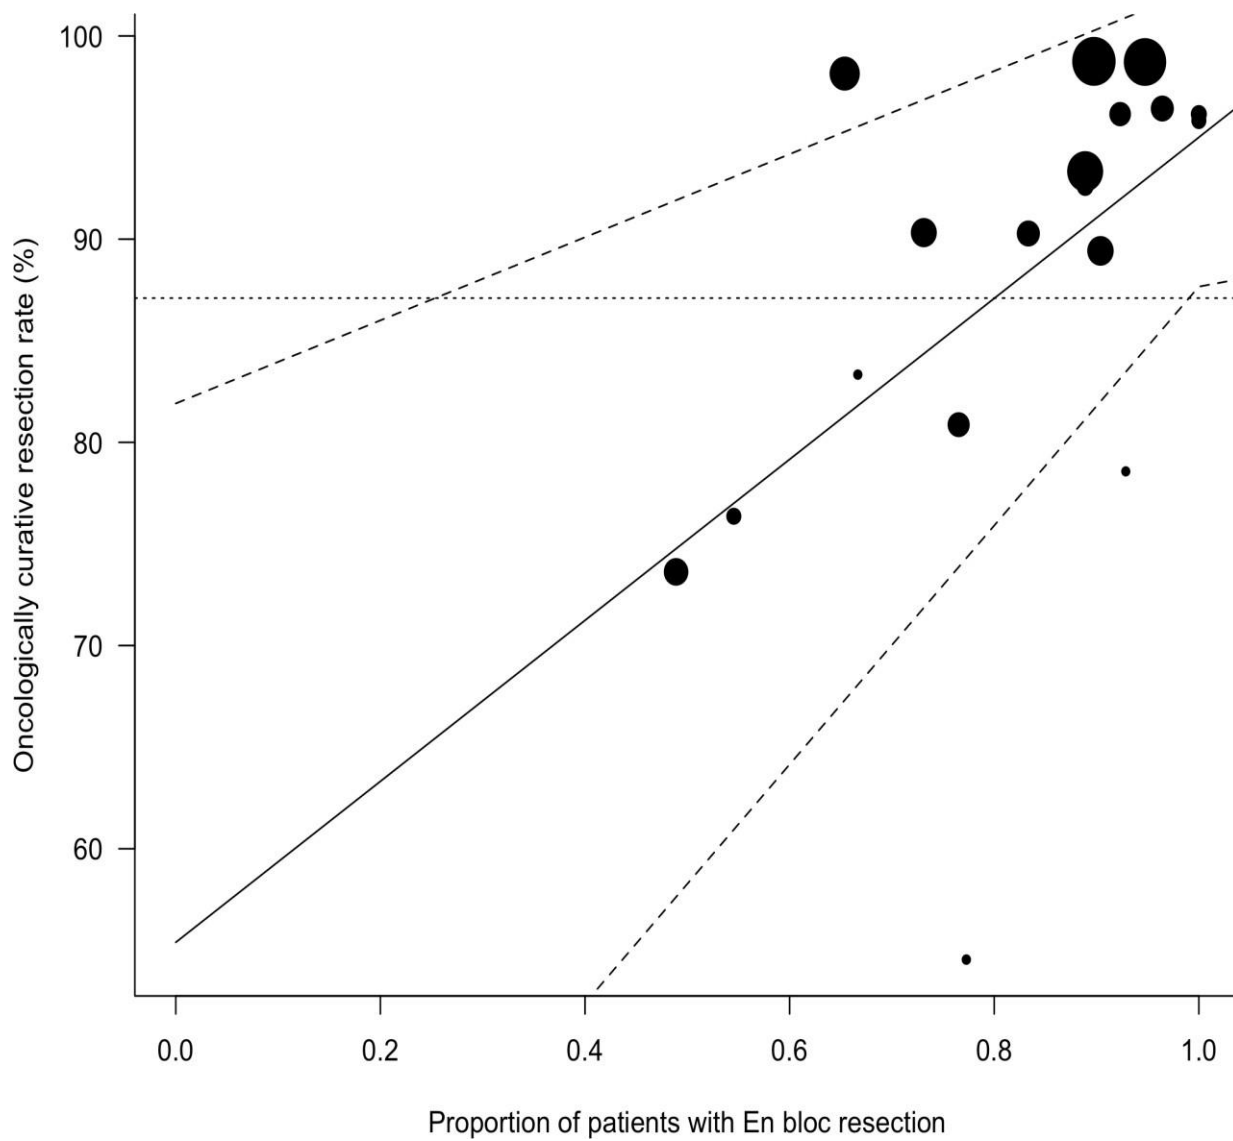

**Supplementary figure 4:** Forest plot reporting the rates of recurrence. CI: confidence interval. RE: random effect.

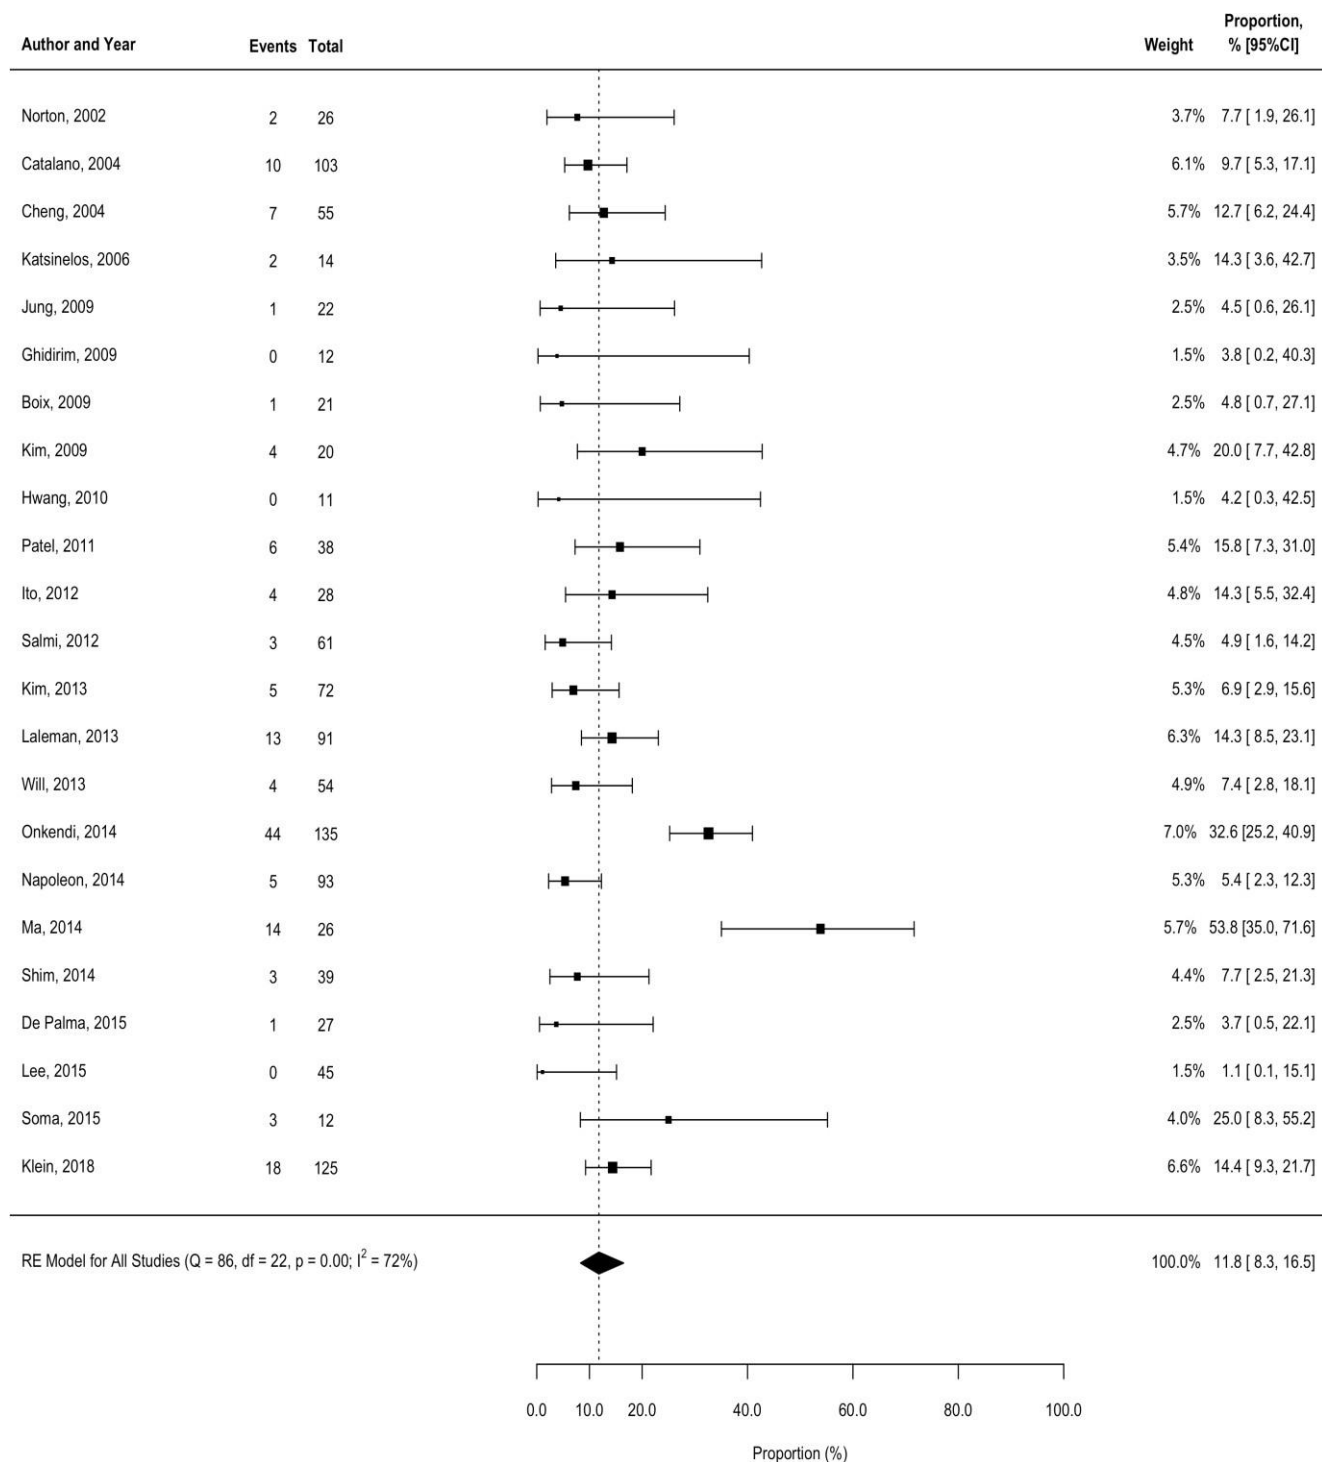

**Supplementary Figure 5:** Forest plot reporting the rates of definitive treatment. CI: confidence interval. RE: random effect.

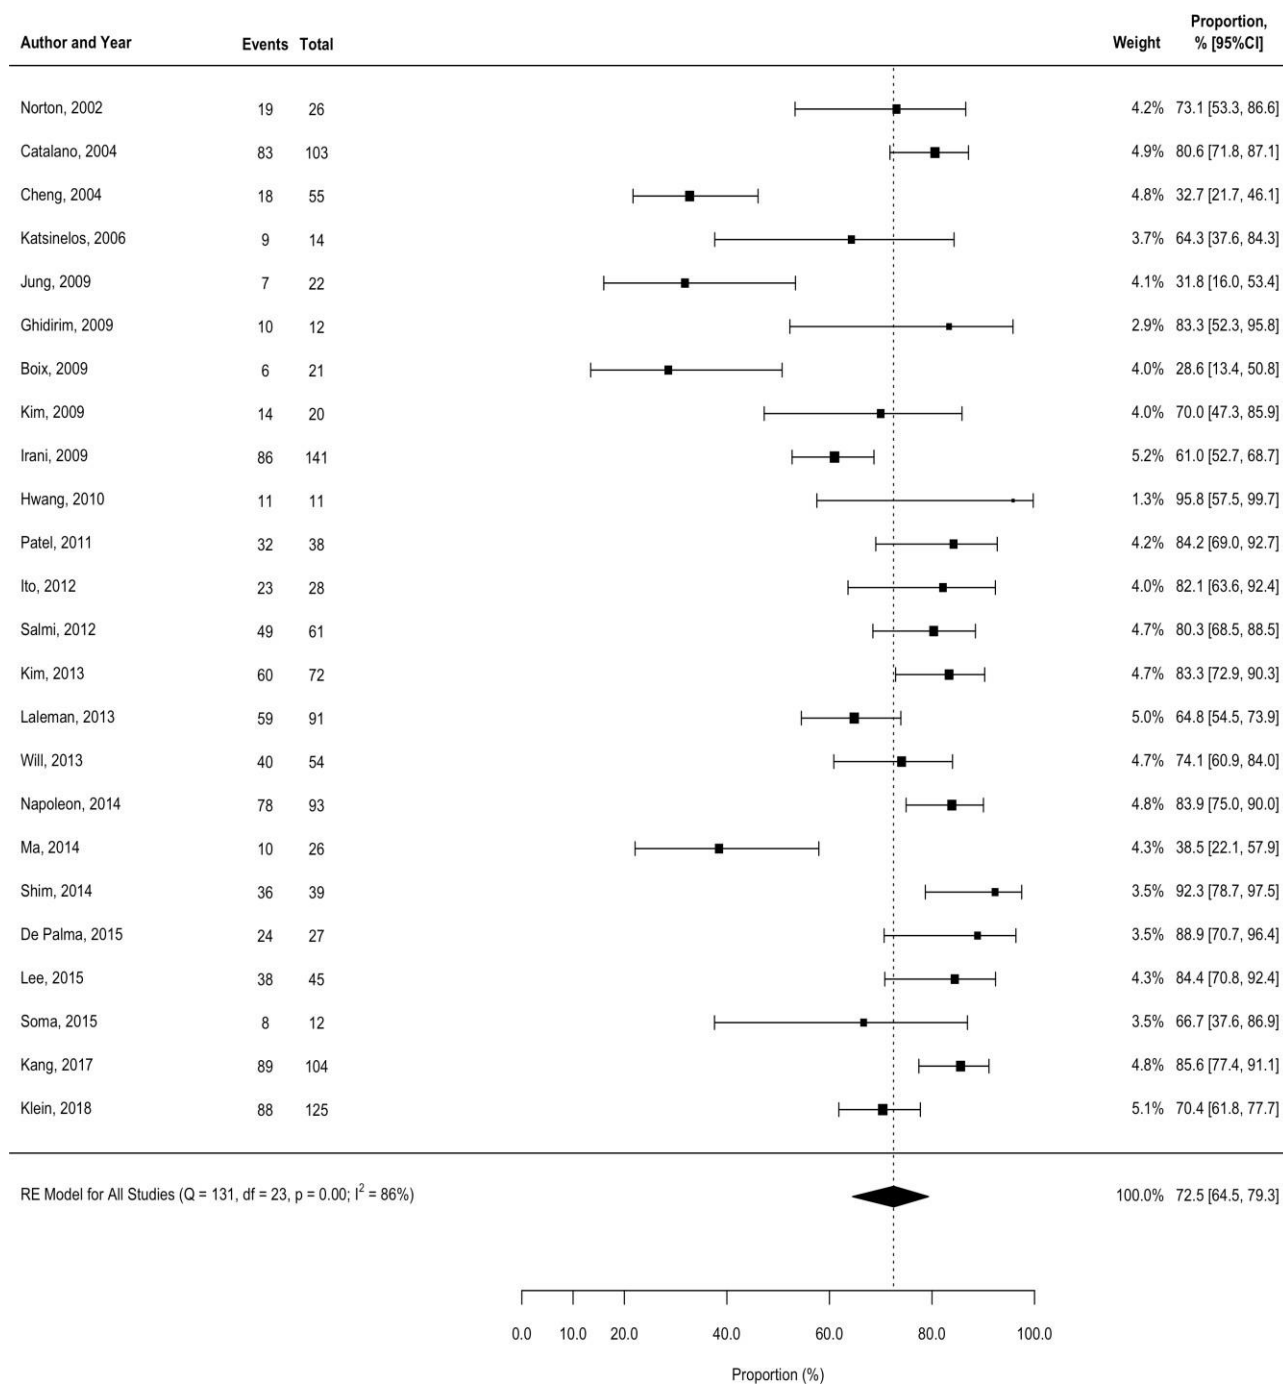

**Supplementary Figure 6:** Forest plot reporting the rates of lesions endoscopically managed. CI: confidence interval. RE: random effect.

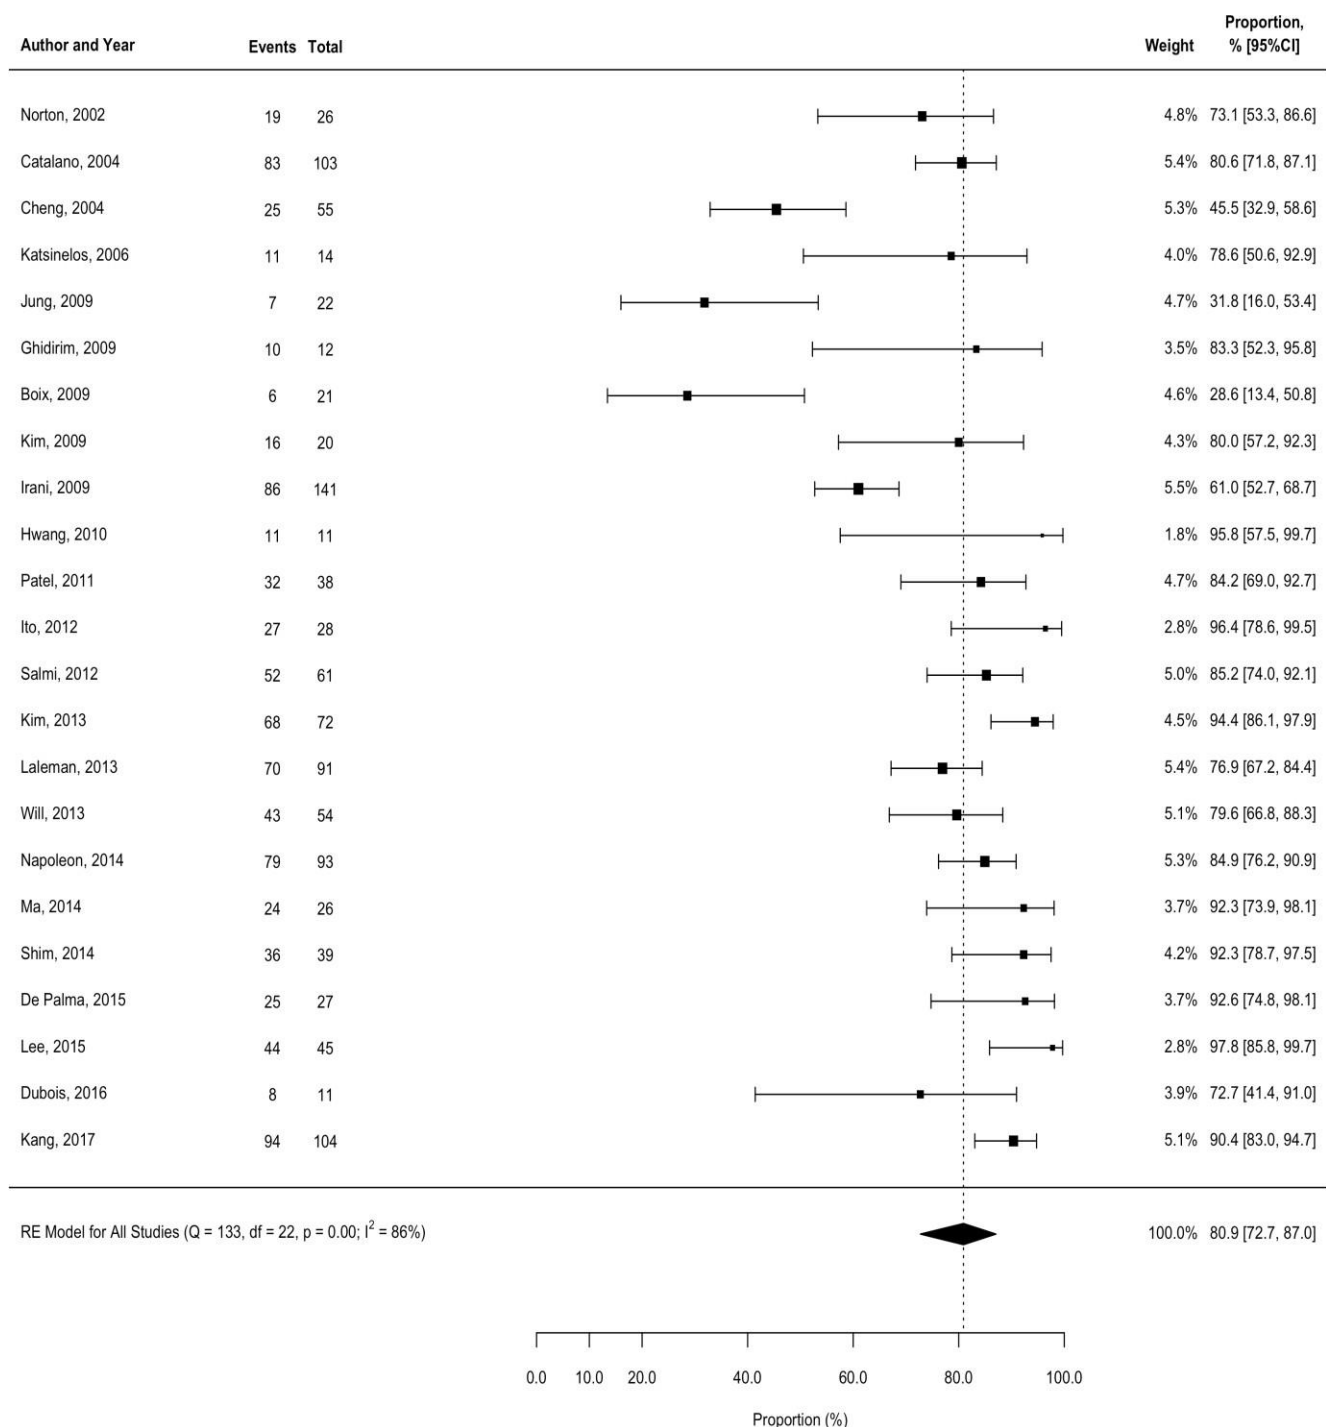

Supplementary Figure 7: Funnel plot reporting the risk of publication bias.

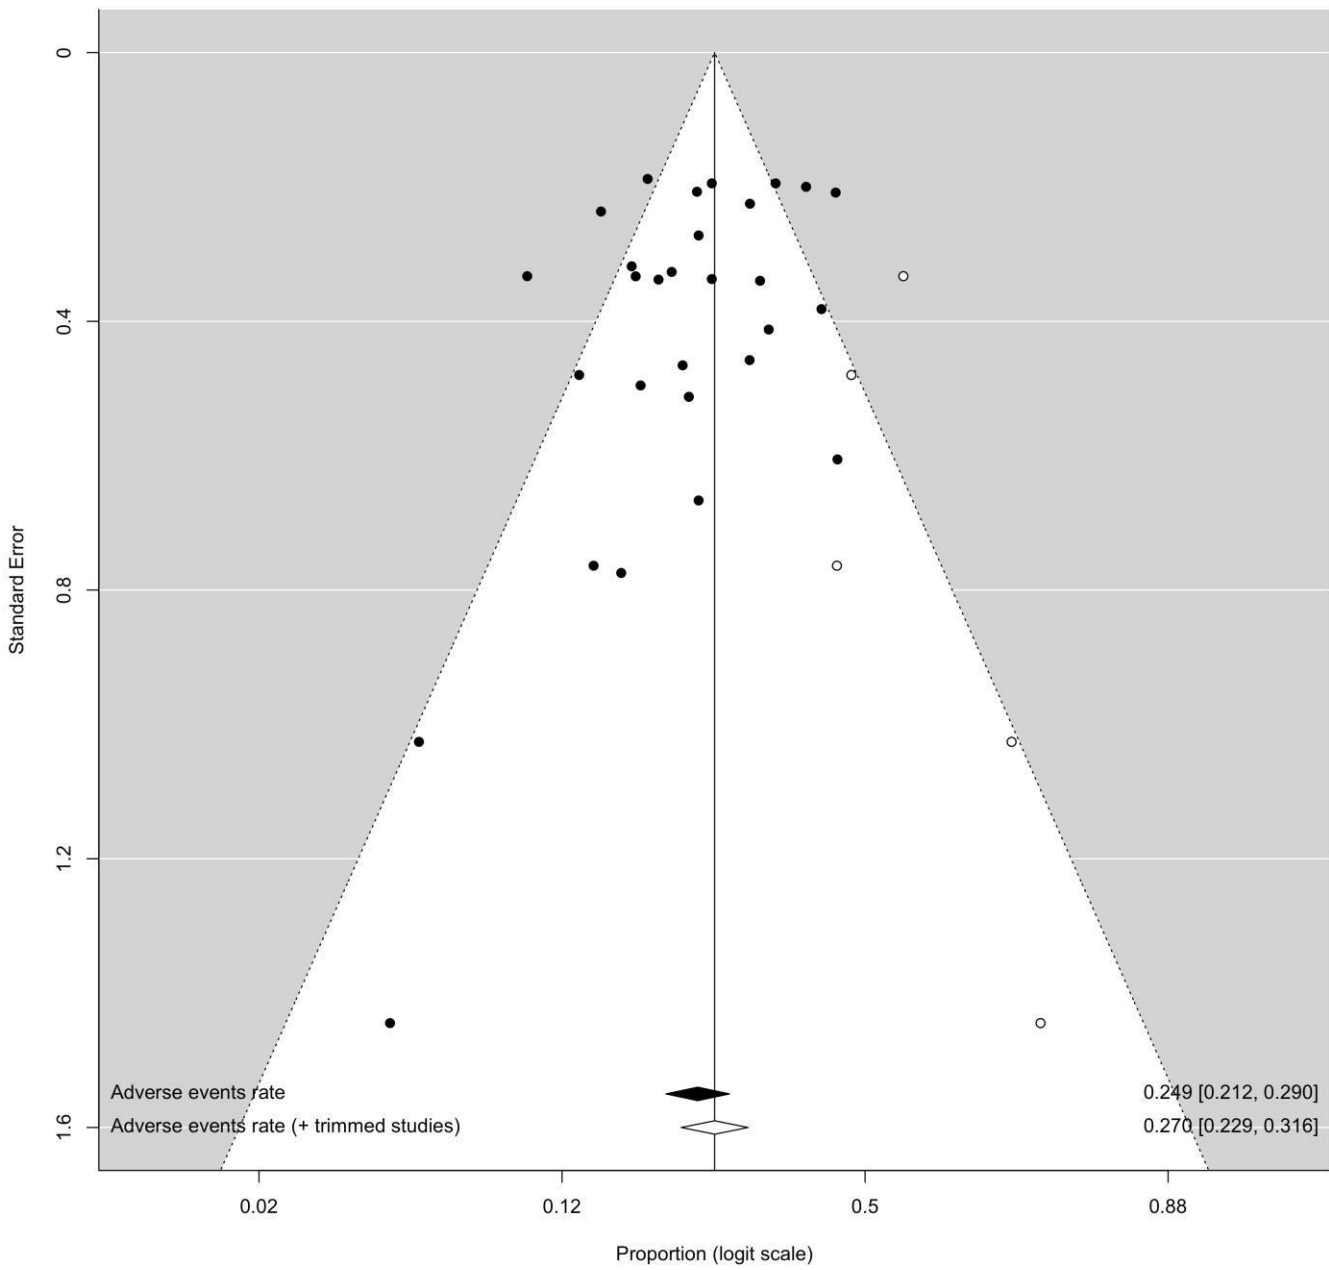

## **Appendix 1**

### **Data sources and search strategy**

We performed a comprehensive literature search by using PubMed, EMBASE and SCOPUS (up to September 31<sup>st</sup> 2018) to identify full articles evaluating outcomes of endoscopic papillectomy for the treatment of ampullary lesions. PROSPERO was searched for ongoing or recently completed systematic reviews. Electronic searches were supplemented by manual searches of references of included studies and review articles.

We identified studies using the following medical subject headings (MeSH) and keywords including: “endoscopic papillectomy” and “endoscopic ampullectomy”. The search was restricted to English language.

The Medline search strategy was: "endoscopy"[MeSH Terms] OR "endoscopy"[All Fields] OR "endoscopic"[All Fields]) AND papillectomy[All Fields] OR ("endoscopy"[MeSH Terms] OR "endoscopy"[All Fields] OR "endoscopic"[All Fields]) AND ampullectomy[All Fields].

### **Selection process**

Two review authors (M.S.; L.F.) independently screened the titles and abstracts yielded by the search against the inclusion criteria. Full reports were obtained for all titles that appeared to meet the inclusion criteria or where there was any uncertainty. Review author pairs then screened the full text and abstract reports and decided whether these met the inclusion criteria. Disagreements were resolved through discussion of all the authors. The reasons for excluding trials were recorded. Neither of the review authors was blinded to the journal titles or to the study authors or institutions. When there were multiple articles for a single study, we used the latest publication and supplemented it, if necessary, with data from the more complete version.

### **Inclusion and exclusion criteria**

For the purpose of this systematic review, we included all clinical studies enrolling at least 10 patients with ampullary lesions treated by EP and reporting the rate of adverse events. Prospective and retrospective studies, published as full text, were considered. Studies not explicitly stating the endoscopic resectability criteria assessed during the pre-operative work up (i.e. dimensional limit, absence of intraductal ingrowth or endoscopic signs of malignancies or deep invasion) were excluded. Studies not published in the English language were excluded.

### **Data extraction**

Using standardized forms, two reviewers (M.S., L.F.) extracted data independently and in duplicate from each eligible study. Reviewers resolved disagreements by discussion. Unresolved disagreements were resolved by two arbitrators (L.F., A.R.). The following data were extracted for each study including the publication status, the study design and location, the number of centers involved, the enrolment period, the number of all lesions treated and the number of sporadic or familial lesions, the mean number of lesions per center per year, patient characteristics (average age, gender), mean tumor size, clinical presentation (Jaundice, Pain, Cholangitis, Pancreatitis, Asymptomatic), intraductal ingrowth, preoperative work-up, prophylactic biliary stenting and/or pancreatic stenting, number of lesions completely resected, number of lesions resected en-bloc, number of lesions with curative resection, need for same-session adjunctive treatments, adverse events (bleedings, perforations, pancreatitis, cholangitis papillary stenosis, deaths) and need for treatments (blood transfusions, embolizations, surgery) histology of the resected lesions (ie, adenoma, submucosal cancer and deep of infiltration, other histologies), number of patients in follow-up, mean follow-up period, number of patients



with recurrence, endoscopic re-treatment, incompleteness related surgery, recurrence related surgery and overall need for surgery, number of patient with curative resection and no recurrences, number of patients managed only by endoscopy.

### **Quality assessment**

Quality was assessed by the modified Newcastle-Ottawa Scale for non-randomized studies, ranging from 0 (low-quality) to 5 (high-quality). Two reviewers (MS, LF) assessed quality measures for included studies and discrepancies were adjudicated by collegial discussion.

### **Outcomes assessment**

The primary outcome was the rate of adverse events on a per-lesion basis. Secondary outcomes were the rate of complete resection, the rate of en-bloc resection, the rate of curative resection and the rate of cases needing a same-session adjunctive treatment if provided. The rate of recurrence, on a per-lesions basis, and both the rate of recurrence endoscopically re-treated and the rate of those surgically treated, were also assessed if provided. Further secondary outcomes were the prevalence of adenomas and the prevalence of invasive cancer. Finally the rate of definitive resection and the rate of endoscopically-managed lesions were also reported.

### **Outcomes Definitions**

*Adverse events:* bleeding, perforation, post-papillectomy pancreatitis, cholangitis and papillary stricture were regarded as adverse events. Any intra- or post-procedural adverse events were reported.

*Complete endoscopic resection:* endoscopic resection was classified as “Complete” in the absence of any adenomatous remnant from the resection margins at the end the procedure, after meticulous endoscopic inspection. This indicator of technical success was not considered to be affected by any same-session adjunctive endoscopic treatment (i.e., soft tip coagulation or Argon Plasma Coagulation of margins).

*Curative resection:* endoscopic resection was considered as “Curative” in the absence of any histological features predicting a loco-regional persistence of dysplastic/neoplastic disease:

- Lateral or vertical margins testing positive for the excised lesion.
- Evidence of submucosal cancer or deeper infiltration.

*Definitive resection:* endoscopic resection was regarded as “Definitive” in the absence of any recurrence in the follow-up period after obtaining a Curative resection.

*Endoscopically managed lesion:* ampullary lesions were considered as “Endoscopically managed” in the presence of a complete excision of the lesion, regardless of the number of sessions required and the detection of a recurrence in the follow-up period, if this was amenable to endoscopic treatment again.

### **Statistical Analysis**

The pooled proportions and rates were calculated using a random effects model in case of substantial heterogeneity across studies; otherwise, we used a fixed effect model<sup>1</sup>. Dependent variables were modeled on the logit (log-odds) scale and then converted to percentages with 95% confidence intervals (95% CIs). We computed statistical heterogeneity with the I<sup>2</sup> statistic (high heterogeneity level >50%) and tested it using the Q2 test (statistical significance level set as p< 0.1). We developed subgroup meta-analytic models selecting a priori variables which could affect the outcomes, such as the mean lesion size. We also explored possible relationship between study variables and outcomes by means of univariate

metaregression.

Publication bias was assessed by means of funnel plot with trim-and-fill analysis and by Begg and Mazumdar's test<sup>2</sup>.

All the analyses were performed using R statistical software with metafor package. All tests were 2-sided, and statistical significance was considered as  $p < 0.05$ , excluding the investigation of heterogeneity across studies in which  $p < 0.10$  was regarded as significant.

## References

1. DerSimonian R, Laird N. Meta-analysis in clinical trials revisited. *Contemporary clinical trials* 2015;45:139-45.
2. Begg CB, Mazumdar M. Operating characteristics of a rank correlation test for publication bias. *Biometrics* 1994;50:1088-101.

## Appendix 2

### Study characteristics and quality

All studies were published between 2002 and 2018. The study countries were the following: 10 were performed in Asia (468 lesions), 9 in the United States (774 lesions), 9 in Europe (384 lesions), and 1 in Australia (125 lesions). Six studies had a prospective design and the other 23 were retrospective. Twenty-five of 29 were single-center studies, otherwise 4 studies reported results of multicenter experiences. Study characteristics are briefly reported in Appendix 2, Supplementary Table 8.

In total, the 29 studies included 1751 ampullary lesions which were removed endoscopically. The 66.8% (52.5-81.0%) of the lesions were sporadic ampullary lesions. The remaining lesions were related to Familial Adenomatous Polyposis. Patients had a mean age of 60.2 (56.9-63.5) years, most of them being male (617/1178 patients, 24 studies). Among the 16 studies reporting data on clinical symptoms leading to the endoscopic treatment, 485 of 1081 ampullary lesions were asymptomatic. On the other hand the 14.4% (6.9-21.9%), 16.6% (7.1-26.0%), 4.1% (1.9-6.3%), and 1% (0.3-1.6%) of patients were reported to suffer from abdominal pain, jaundice, pancreatitis and cholangitis, respectively.

The mean lesion size was 15.7 mm (13.1-18.3;). All the studies reported histological features of resected ampullary lesions: the 80.4% (74.6-86.3%) of lesions were adenomas, with the 19.7% (13.4-26.0%) of them having high grade dysplasia (HGD) stigmata. Otherwise, the 11.3% (7.7-14.8%) were found to be malignant adenocarcinomas. The average Newcastle Ottawa score of the studies was 5.7 (range 4-6).

### Subgroup analysis on placing prophylactic pancreatic stenting or not.

A prophylactic pancreatic stent was placed after most of the resections (77.4% of cases, 66.7-85.4) across 21 studies (1262 lesions). Pancreatic stent characteristics were reported in appendix 2, Table 10.

Twelve of the included studies provided data on post-procedural pancreatitis occurring after prophylactic pancreatic stent placement; the calculated pooled rate was 6.9% (4.8-10.0;  $I^2=0\%$ ).

Otherwise the post-procedural pancreatitis rate was 20.7% (13.5-30.4;  $I^2=0\%$ ) among patients in whom a prophylactic pancreatic stent was not placed. Prophylactic pancreatic stent placement significantly decrease the risk of post procedural pancreatitis ( $p < 0.001$ ).

**Follow-up:**

Mean post resection follow up, ranging from 9.6 to 84.5 months, was reported by 25 studies including 1331 ampullary lesions. The pooled recurrence rate was 11.8% (8.3-16.5;  $I^2=72\%$ ). (Supplementary Figure 4).

The pooled rate of ampullary lesions definitively managed through single endoscopic approach was 72.5% (64.5-69.3) (Supplementary Figure 5).

On the other hand, 7.5% (4.6-11.9;  $I^2=73\%$ ) of patients benefited from an endoscopic re-treatment. Thus 80.9% (72.7-87.0) of ampullary lesions effectively treated by endoscopic fashion only (Supplementary Figure 6). An overview of the main follow-up outcomes is reported in Supplementary Table 9.

Based on the data reported by 24 studies, 95 patients were referred for surgery following a non-curative endoscopic resection, yielding a pooled rate of 7.7% (4.4-13.2;  $I^2=82\%$ ). Moreover, surgery was needed in the 4.1% (2.8-6.2;  $I^2=32\%$ ) of patients due to recurrent lesions.

An overall pooled rate of 9.7% (6.0-15.3;  $I^2= 83\%$ ) patients underwent surgery across the included studies.

**Publication bias on primary outcome (overall adverse events).**

Significant publication bias was found according to Egger's test for funnel plot asymmetry ( $z = -2.0796$ ,  $p = 0.0376$ ). On trim-and-fill analysis, 5 missing studies were found, all on the right side of the pooled estimate, i.e. yielding a higher adverse events rate. However, adding trimmed studies did not significantly affect the outcome estimate (Supplementary Figure 7), therefore publication bias was judged as trivial.

**Supplementary table 1.** Univariate metaregression on overall adverse events rate. Analysis is conducted on logarithmic scale.

| Variable                                   | Coefficient           | Standard error | P value | R <sup>2</sup> (amount of heterogeneity accounted for) |
|--------------------------------------------|-----------------------|----------------|---------|--------------------------------------------------------|
| Mean age                                   | 0.01 (-0.03 to 0.04)  | 0.02           | 0.748   | 0%                                                     |
| Mean number of lesions per center per year | 0.01 (-0.02 to 0.04)  | 0.02           | 0.421   | 0%                                                     |
| Mean tumor size                            | -0.02 (-0.10 to 0.06) | 0.04           | 0.561   | 0%                                                     |
| Asymptomatic onset (proportion)            | 0.69 (-0.19 to 1.56)  | 0.44           | 0.123   | 10%                                                    |
| En bloc resection rate (proportion)        | 0.93 (-0.62 to 2.47)  | 0.79           | 0.241   | 12%                                                    |
| Biliary stenting (proportion)              | -0.71 (-2.43 to 1.01) | 0.88           | 0.420   | 0%                                                     |
| Pancreatic stenting (proportion)           | -0.55 (-1.79 to 0.69) | 0.63           | 0.386   | 7%                                                     |
| Adenocarcinoma (proportion)                | 1.31 (-0.39 to 3.02)  | 0.87           | 0.130   | 11%                                                    |

**Supplementary Table 2.** Univariate metaregression on pancreatitis rate. Analysis is conducted on logarithmic scale.

| Variable                                   | Coefficient                   | Standard error | P value       | R <sup>2</sup> (amount of heterogeneity accounted for) |
|--------------------------------------------|-------------------------------|----------------|---------------|--------------------------------------------------------|
| Mean age                                   | -0.01 (-0.04 to 0.02)         | 0.02           | 0.376         | 0%                                                     |
| Mean number of lesions per center per year | 0.01 (-0.02 to 0.04)          | 0.02           | 0.334         | 8%                                                     |
| Mean tumor size                            | -0.03 (-0.01 to 0.05)         | 0.04           | 0.492         | 0%                                                     |
| Pancreatitis onset (proportion)            | 3.77 (-12.80 to 20.33)        | 8.45           | 0.656         | 0%                                                     |
| <b>Pancreatic stenting (proportion)</b>    | <b>-1.72 (-2.95 to -0.50)</b> | <b>0.63</b>    | <b>0.006*</b> | <b>62%</b>                                             |
| Adenocarcinoma (proportion)                | 1.44 (-0.48 to 3.37)          | 0.98           | 0.141         | 10%                                                    |

**Supplementary table 3.** Overview of Adverse Events (AE). Causes of deaths were: necrotizing pancreatitis (3), retroperitoneal perforation (2), acute myocardial infarction (1) BT: blood transfusion.

| Reference       | Bleed | BT | Embolization | perforation | Pancreatitis | Severe pancreatitis | Cholangitis | Stenosis | Overall AEs | AEs surgery | Death |
|-----------------|-------|----|--------------|-------------|--------------|---------------------|-------------|----------|-------------|-------------|-------|
| Norton 2002     | 2     | 0  | 0            | 1           | 4            | 0                   | 0           | 2        | 9           | 0           | 0     |
| Catalano 2004   | 2     | 0  | 0            | 0           | 5            | 0                   | 0           | 3        | 10          | 1           | 0     |
| Cheng 2004      | 4     | \  | \            | 1           | 5            | 0                   | 0           | 2        | 12          | 0           | 0     |
| Katsinelos 2006 | 1     | 0  | 0            | 0           | 1            | 0                   | 0           | 0        | 2           | 0           | 0     |
| Jung 2009       | 1     | \  | 0            | 0           | 4            | 0                   | 2           | 0        | 7           | 0           | 0     |
| Ghidirim 2009   | 2     |    |              | 0           | 1            | 0                   | 0           | 0        | 3           | 0           | 0     |
| Boix 2009       | 1     | \  | 0            | 0           | 4            | 0                   | 0           | 0        | 5           | 0           | 0     |
| Kim 2009        | 0     | 0  | 0            | 0           | 1            | 1                   | 0           | 0        | 1           | 0           | 1     |
| Irani 2009      | 5     | \  | 1            | 2           | 10           | 0                   | 1           | 3        | 21          | 1           | 0     |
| Hwang 2010      | 4     | 0  | 0            | 0           | 0            | 0                   | 0           | 1        | 5           | 0           | 0     |
| Patel 2011      | 2     | 0  | 0            | 0           | 3            | 0                   | 0           | 0        | 5           | 0           | 0     |
| Ito 2012        | 7     | 0  | 0            | 2           | 0            | 0                   | 3           | 0        | 12          | 0           | 0     |
| Salmi 2012      | 3     | \  | \            | 2           | 6            | 1                   | 0           | 0        | 11          | 1           | 0     |
| Ceppa 2013      | 6     | \  | \            | 0           | 6            | 0                   | 0           | 0        | 12          | 0           | 0     |
| Kim 2013        | 12    | \  | 0            | 0           | 6            | 0                   | 0           | 0        | 18          | 0           | 0     |
| Laleman 2013    | 11    | 3  | 1            | 0           | 14           | 1                   | 4           | 0        | 29          | 0           | 0     |
| Will 2013       | 3     | \  | \            | 1           | 7            | 0                   | 0           | 0        | 11          | 0           | 0     |
| Riditid 2014    | 23    | \  | \            | 3           | 9            | 0                   | 0           | 0        | 35          | 1           | 1     |
| Onkendi 2014    | 17    | 7  | 2            | 0           | 19           | 3                   | 0           | 0        | 36          | 0           | 0     |
| Napoleon 2014   | 11    | 5  | 0            | 4           | 22           | 4                   | 5           | 0        | 42          | 3           | 1     |
| Ma 2014         | 1     | 1  | 0            |             | 5            | 4                   | 0           | 0        | 6           | 0           | 0     |
| Shim 2014       | 4     | 0  | 0            | 2           | 7            | 2                   | 0           | 0        | 13          | 0           | 0     |
| De Palma 2015   | 2     | 0  | 0            | 0           | 3            | 0                   | 0           | 0        | 5           | 0           | 0     |
| Lee 2015        | 3     | \  | 1            | 1           | 7            | 1                   | 0           | 1        | 12          | 0           | 0     |
| Tsuji 2015      | 21    | 9  | 1            | 3           | 12           | 1                   | 0           | 5        | 41          | 0           | 1     |
| Soma 2015       | 1     | \  | 0            | 0           | 1            | 0                   | 0           | 0        | 2           | 0           | 0     |
| Dubois 2016     | 0     | 0  | 0            | 0           | 0            | 0                   | 0           | 0        | 0           | 0           | 0     |
| Kang 2017       | 18    | \  | 0            | 8           | 16           | 0                   | 0           | 0        | 42          | 4           | 2     |
| Klein 2018      | 30    | 8  | 0            | 1           | 9            | 0                   | 0           | 0        | 31          | 0           | 0     |

**Supplementary table 4.** Univariate metaregression on oncologically curative resection rate. Analysis is conducted on logarithmic scale.

| Variable                                   | Coefficient           | Standard error | P value | R <sup>2</sup> (amount of heterogeneity accounted for) |
|--------------------------------------------|-----------------------|----------------|---------|--------------------------------------------------------|
| Mean tumor size                            | -0.03 (-0.20 to 0.13) | 0.08           | 0.715   | 0%                                                     |
| Mean number of lesions per center per year | 0.02 (-0.03 to 0.06)  | 0.02           | 0.496   | 2%                                                     |
| En bloc resection rate (proportion)        | 3.55 (1.11 to 5.99)   | 1.24           | 0.004*  | 49%                                                    |

**Supplementary table 5.** Overview of Resection Outcomes.

| Reference       | Complete resection | En Bloc | Curative resection | Need for Surgery (not curative) |
|-----------------|--------------------|---------|--------------------|---------------------------------|
| Norton 2002     | 26                 | 24      | 25                 | 1                               |
| Catalano 2004   | 99                 | \       | 93                 | 6                               |
| Cheng 2004      | 53                 | 30      | 42                 | 1<br>3                          |
| Katsinelos 2006 | 14                 | 13      | 11                 | 3                               |
| Jung 2009       | 17                 | 17      | 12                 | 6                               |
| Ghidirim 2009   | 11                 | 8       | 10                 | 2                               |
| Boix 2009       | \                  | \       | \                  | 1<br>5                          |
| Kim 2009        | 20                 | \       | 18                 | 1                               |
| Irani 2009      | \                  | \       | \                  | \                               |
| Hwang 2010      | 11                 | 11      | 11                 | 0                               |
| Patel 2011      | 38                 | 36      | 38                 | 0                               |
| Ito 2012        | 28                 | 27      | 27                 | 0                               |
| Salmi 2012      | 61                 | \       | 52                 | 5                               |
| Ceppa 2013      | \                  | \       | 68                 | 0                               |
| Kim 2013        | 65                 | 60      | 65                 | 0                               |
| Laleman 2013    | 71                 | \       | 71                 | 1<br>7                          |
| Will 2013       | 46                 | \       | 44                 | 0                               |
| Ridditid 2014   | \                  | 89      | 134                | \                               |
| Onkendi 2014    | 126                | 120     | 126                | \                               |
| Napoleon 2014   | 93                 | 68      | 84                 | 4                               |
| Ma 2014         | 26                 | 17      | 26                 | 0                               |
| Shim 2014       | \                  | 35      | 39                 | \                               |
| De Palma 2015   | 27                 | 24      | 25                 | 2                               |
| Lee 2015        | 45                 | /       | 38                 | 1                               |

|             |     |    |     |   |
|-------------|-----|----|-----|---|
| Tsuji 2015  | 93  | 88 | 93  | 1 |
| Soma 2015   | 12  | 12 | 12  | \ |
| Dubois 2016 | 8   | \  | 7   | 4 |
| Kang 2017   | 104 | 94 | 93  | 6 |
| Klein 2018  | 122 | NA | 117 | 8 |

**Supplementary table 6.** Sensitivity analysis: patients and lesions characteristics.

| <b>Variable</b>                     | <b>Pooled estimates</b> | <b>I<sup>2</sup></b> |
|-------------------------------------|-------------------------|----------------------|
| <b>Mean tumor size</b>              | 16.8                    | 98%                  |
| <b>Mean age</b>                     | 63.0                    | 50%                  |
| <b>Onset</b>                        |                         |                      |
| <b>Jaundice onset</b>               | 19.5%                   | 97%                  |
| <b>Pain onset</b>                   | 14.4%                   | 99%                  |
| <b>Cholangitis onset</b>            | 0.6%                    | 1%                   |
| <b>Pancreatitis onset</b>           | 5.4%                    | 95%                  |
| <b>Histology</b>                    |                         |                      |
| <b>Proportion of adenomas</b>       | 78.6%                   | 96%                  |
| <b>Proportion of adenocarcinoma</b> | 10.4%                   | 92%                  |

**Supplementary Table 7.** Efficacy issues to be addressed by ideal future studies on endoscopic papillectomy.

| HOW SHOULD IT BE?                                                                                                                                                                                                                                                                                                                                                                                                                                                                                                                                                                                                                                                                                                                                                                                                                                                                                                                                                                                                                                                                                                                                                                                                                                                                                         |
|-----------------------------------------------------------------------------------------------------------------------------------------------------------------------------------------------------------------------------------------------------------------------------------------------------------------------------------------------------------------------------------------------------------------------------------------------------------------------------------------------------------------------------------------------------------------------------------------------------------------------------------------------------------------------------------------------------------------------------------------------------------------------------------------------------------------------------------------------------------------------------------------------------------------------------------------------------------------------------------------------------------------------------------------------------------------------------------------------------------------------------------------------------------------------------------------------------------------------------------------------------------------------------------------------------------|
| <ul style="list-style-type: none"><li>-Prospective design</li><li>-Multiple referral centers should be involved</li><li>-Strict inclusion criteria based on:<ul style="list-style-type: none"><li>○ Endoscopic features (EGD + ERCP)</li><li>○ Radiologic features (MRI+MRCP or EUS)</li><li>○ Histologic features</li></ul></li><li>-Strict exclusion criteria:<ul style="list-style-type: none"><li>○ FAP or less common familial conditions</li></ul></li><li>-Unique outcome definitions in terms of efficacy:<ul style="list-style-type: none"><li>○ Technical success</li><li>○ En bloc resection</li><li>○ Complete resection (R0), histologically assessed as an en bloc resection with both lateral and deep margin free from dysplasia/neoplasia</li><li>○ Oncologically curative resection defined as an R0 resection without poor prognostic histologic features</li><li>○ Recurrence</li><li>○ Definitively curative resection, defined as cured lesion with no recurrences within an adequate follow up time. The endoscopic follow up should include biopsy sampling</li><li>○ Patients saved from surgery</li></ul></li><li>-Appropriate statistical analysis including cost/efficacy analysis and uni-multivariate analysis investigating factors predicting efficacy outcomes</li></ul> |



**Supplementary table 8:** studies characteristics

| Author     | Year | Country     | Design        | Mono/Multicenter | Period    | Lesions (n) |
|------------|------|-------------|---------------|------------------|-----------|-------------|
| Norton     | 2002 | USA         | Retrospective | Mono             | 1997-1999 | 26          |
| Catalano   | 2004 | USA         | Retrospective | Multi (4)        | 1998-2001 | 103         |
| Cheng      | 2004 | USA         | Retrospective | Mono             | 1994-2003 | 55          |
| Katsinelos | 2006 | Greece      | Retrospective | Mono             | 1998-2004 | 14          |
| Jung       | 2009 | Korea       | Retrospective | Mono             | 2003-2008 | 22          |
| Ghidirim   | 2009 | Moldova     | Retrospective | Mono             | 1998-2008 | 12          |
| Boix       | 2009 | Spain       | Retrospective | Mono             | 1995-2007 | 21          |
| Kim        | 2009 | Korea       | Retrospective | Mono             | 1997-2008 | 20          |
| Irani      | 2009 | USA         | Retrospective | Mono             | 1997-2007 | 141         |
| Hwang      | 2010 | Korea       | Prospective   | Mono             | 2007-2009 | 11          |
| Patel      | 2011 | USA         | Retrospective | Mono             | 1996-2009 | 38          |
| Ito        | 2012 | Japan       | Retrospective | Mono             | 2002-2010 | 28          |
| Salmi      | 2012 | France      | Prospective   | Mono             | 2002-2009 | 61          |
| Ceppa      | 2013 | USA         | Retrospective | Mono             | 2000-2010 | 68          |
| Kim        | 2013 | Korea       | Prospective   | Mono             | 2005-2012 | 72          |
| Laleman    | 2013 | Belgium     | Retrospective | Mono             | 2000-2008 | 91          |
| Will       | 2013 | Germany     | Prospective   | Mono             | 2005-2012 | 54          |
| Ridditid   | 2014 | USA         | Retrospective | Mono             | 1995-2012 | 182         |
| Onkendi    | 2014 | USA         | Retrospective | Mono             | 1994-2009 | 135         |
| Napoleon   | 2014 | France      | Prospective   | Multi (12)       | 2003-2006 | 93          |
| Ma         | 2014 | USA         | Retrospective | Multi (2)        | 2000-2010 | 26          |
| Shim       | 2014 | Korea       | Retrospective | Mono             | 2006-2012 | 39          |
| De Palma   | 2015 | Italy       | Retrospective | Mono             | 2008-2013 | 27          |
| Lee        | 2015 | Korea       | Prospective   | Mono             | 2012-2014 | 45          |
| Tsuji      | 2015 | Tokyo       | Retrospective | Mono             | 1999-2014 | 115         |
| Soma       | 2015 | Tokyo       | Retrospective | Mono             | 2008-2011 | 12          |
| Dubois     | 2016 | Switzerland | Retrospective | Mono             | 2005-2015 | 11          |
| Kang       | 2017 | Korea       | Retrospective | Multi (5)        | 2007-2014 | 104         |
| Klein      | 2018 | Australia   | Retrospective | Mono             | 2009-2017 | 125         |

**Supplementary table 9.** Overview of Follow-up (FU) Outcomes.

| Reference       | Patients in FU | FU (months) | Recurrences | Endoscopic re-treatment | Surgery (recurrence) | Definitive treatment | Endoscopically managed |
|-----------------|----------------|-------------|-------------|-------------------------|----------------------|----------------------|------------------------|
| Norton 2002     | 22             | 13          | 2           | \                       | \                    | 19                   | 19                     |
| Catalano 2004   | 103            | 36          | 10          | 0                       | 10                   | 83                   | 83                     |
| Cheng 2004      | 38             | 30          | 7           | 7                       | 0                    | 18                   | 25                     |
| Katsinelos 2006 | 14             | 28,3        | 2           | 2                       | 0                    | 9                    | 11                     |
| Jung 2009       | 18             | 9,6         | 1           | 0                       | 1                    | 7                    | 7                      |
| Ghidirim 2009   | 10             | \           | 0           | 0                       | 0                    | 10                   | 10                     |
| Boix 2009       | 21             | 15,9        | 1           | 1                       | 0                    | 6                    | 6                      |
| Kim 2009        | 20             | 20          | 4           | 2                       | 2                    | 14                   | 16                     |
| Irani 2009      | 119            | \           | \           | \                       | \                    | 86                   | 86                     |
| Hwang 2010      | 11             | 12,1        | 0           | 0                       | 0                    | 11                   | 11                     |
| Patel 2011      | 38             | 17,2        | 6           | 6                       | 0                    | 32                   | 32                     |
| Ito 2012        | 28             | 26,1        | 4           | 4                       | 0                    | 23                   | 27                     |
| Salmi 2012      | 61             | 36          | 3           | 3                       | 0                    | 49                   | 52                     |
| Ceppa 2013      | \              | \           | \           | \                       | \                    | \                    | \                      |
| Kim 2013        | 70             | 23,7        | 5           | 3                       | 2                    | 60                   | 68                     |
| Laleman 2013    | 91             | 32          | 13          | 11                      | 1                    | 59                   | 70                     |
| Will 2013       | 54             | \           | 4           | 3                       | 0                    | 40                   | 43                     |
| Riditid 2014    | \              | \           | \           | \                       | \                    | \                    | \                      |
| Onkendi 2014    | 135            | 53          | 44          | \                       | \                    | \                    | \                      |
| Napoleon 2014   | 93             | \           | 5           | 1                       | 1                    | 78                   | 79                     |
| Ma 2014         | 24             | 84,5        | 14          | 14                      | 0                    | 10                   | 24                     |
| Shim 2014       | 39             | 15          | 3           | \                       | \                    | 36                   | 36                     |
| De Palma 2015   | 27             | 18,4        | 1           | 1                       | 0                    | 24                   | 25                     |
| Lee 2015        | 45             | 13,5        | 0           | 1                       | 0                    | 38                   | 44                     |
| Tsuji 2015      | \              | \           | \           | 20                      | 0                    | \                    | \                      |
| Soma 2015       | 12             | 28,5        | 3           | \                       | \                    | 8                    | \                      |
| Dubois 2016     | \              | \           | \           | 1                       | \                    | \                    | 8                      |
| Kang 2017       | 99             | 44,2        | \           | 5                       | \                    | 89                   | 94                     |
| Klein 2018      | 113            | 18,5        | 18          | 0                       | \                    | 88                   | \                      |

**Supplementary table 10.** Pancreatic stents. All the authors of the included studies used plastic pancreatic stent.

| Reference       | Lenght (cm) | Diameter (Fr) | Producer                |
|-----------------|-------------|---------------|-------------------------|
| Norton 2002     | \           | 5             | \                       |
| Catalano 2004   | \           | \             | \                       |
| Cheng 2004      | \           | 3-5           | Wilson-Cook Medical Inc |
| Katsinelos 2006 | \           | 5             | \                       |
| Jung 2009       | \           | \             | \                       |
| Ghidirim 2009   | 4-5         | 4-7           | Wilson-Cook Medical Inc |
| Boix 2009       | \           | \             | \                       |
| Kim 2009        | \           | \             | \                       |
| Irani 2009      | 8           | 3             | \                       |
| Hwang 2010      | \           | 5             | Daikin Industries       |
| Patel 2011      | \           | 3-5           | \                       |
| Ito 2012        | \           | 5             | \                       |
| Salmi 2012      | 3           | 5             | Wilson-Cook Medical Inc |
| Ceppa 2013      | \           | \             | \                       |
| Kim 2013        | \           | 5             | Wilson-Cook Medical Inc |
| Laleman 2013    | \           | \             | \                       |
| Will 2013       | \           | 5             | GIP Medizintechnik GmbH |
| Ridtitid 2014   | \           | 3-5           | \                       |
| Onkendi 2014    | \           | \             | \                       |
| Napoleon 2014   | \           | \             | \                       |
| Ma 2014         | \           | \             | \                       |
| Shim 2014       | \           | \             | \                       |
| De Palma 2015   | \           | 5-7           | \                       |
| Lee 2015        | 5-7         | 5             | Wilson-Cook Medical Inc |
| Tsuji 2015      | 5-7         | 5             | \                       |
| Soma 2015       | \           | \             | \                       |
| Dubois 2016     | \           | \             | \                       |
| Kang 2017       | \           | \             | \                       |
| Klein 2018      | \           | \             | \                       |
